# Supplementary material for: The impact of stopping or reducing the level of fluoride in public water supplies on dental fluorosis: a systematic review
Source: publisher site journal article supplement (doi:10.1515/reveh-2019-0059), 2020-06-29
Supplement: Supplementary file 1 [file j_reveh-2019-0059_suppl.docx]

**Supplementary material 1** Search strategy and keywords

**Medline via Ovid SP searched (start year: 1946)**

1 exp Fluoridation/ (5417)

2 exp Fluorides/ (31105)

3 exp Fluorine/ (6905)

4 fluorid*.ti,ab. (32142)

5 fluorin*.ti,ab. (12741)

6 flurid*.ti,ab. (110)

7 flurin*.ti,ab. (5)

8 1 or 2 or 3 or 4 or 5 or 6 or 7 (60475)

9 exp Water Supply/ (28475)

10 water.ti,ab. (443155)

11 9 or 10 (449419)

12 cessation.ti,ab. (50176)

13 break.ti,ab. (27654)

14 interruption.ti,ab. (19125)

15 discontinu*.ti,ab. (83383)

16 re-introduc*.ti,ab. (1127)

17 (adjust* adj1 down*).ti,ab. (144)

18 defluoridation.ti,ab. (153)

19 12 or 13 or 14 or 15 or 16 or 17 or 18 (178224)

20 exp Oral Health/ (10671)

21 (oral adj1 health).ti,ab. (13552)

22 caries.ti,ab. (29070)

23 dental.ti,ab. (153813)

24 tooth.ti,ab. (56828)

25 teeth.ti,ab. (72464)

26 dentition.ti,ab. (10968)

27 enamel.ti,ab. (21164)

28 Dental Caries Susceptibility/ (2040)

29 exp Tooth/ (71599)

30 exp Tooth Diseases/ (144299)

31 fluorosis.ti,ab. (2308)

32 flurosis.ti,ab. (5)

33 20 or 21 or 22 or 23 or 24 or 25 or 26 or 27 or 28 or 29 or 30 or 31 or 32 (329750)

36 8 and 11 and 19 and 33 (92)

Number of articles retrieved: 92

**Embase via Ovid SP searched (start year: 1947)**

1 exp Fluoridation/ (6055)

2 exp Fluorides/ (29993)

3 exp Fluorine/ (10661)

4 fluorid*.ti,ab. (45003)

5 fluorin*.ti,ab. (20872)

6 flurid*.ti,ab. (144)

7 flurin*.ti,ab. (14)

8 1 or 2 or 3 or 4 or 5 or 6 or 7 (77484)

9 exp Water Supply/ (30918)

10 water.ti,ab. (687788)

11 8 or 9 (694388)

12 cessation.ti,ab. (72046)

13 break.ti,ab. (40198)

14 interruption.ti,ab. (31288)

15 discontinu*.ti,ab. (138056)

16 re-introduc*.ti,ab. (1823)

17 (adjust* adj1 down*).ti,ab. (204)

18 defluoridation.ti,ab. (291)

19 defluoridation/ (241)

20 12 or 13 or 14 or 15 or 16 or 17 or 18 or 19 (277593)

21 (oral adj1 health).ti,ab. (15154)

22 exp Tooth Disease/ (191821)

23 caries.ti,ab. (34107)

24 dental.ti,ab. (177962)

25 tooth.ti,ab. (66335)

26 teeth.ti,ab. (85767)

27 dentition.ti,ab. (12988)

28 enamel.ti,ab. (24290)

29 exp tooth/ (142556)

30 fluorosis.ti,ab. (3544)

31 flurosis.ti,ab. (15)

32 21 or 22 or 23 or 24 or 25 or 26 or 27 or 28 or 29 or 30 or 31 (415756)

33 8 and 11 and 20 and 32 (185)

Number of articles retrieved: 185

**Cochrane Central Register of Controlled Trials searched (start year:1990)**

Title, abstract and keywords were searched for the following terms:

(fluorid* OR fluorin* OR flurid* OR flurin*)

AND

(water)

AND

(cessation OR break OR interrupt* OR discontinu* OR re-introduc* OR (adjust* NEAR/1 down*) OR defluoridation)

AND

("oral health" OR caries OR dental OR tooth OR teeth OR dentition OR enamel OR fluorosis OR flurosis)

Number of articles retrieved: 36

**Web of Science searched (Start year: 1990)**

(fluorid* OR fluorin* OR flurid* OR flurin*) AND (water) AND (cessation OR break OR interrupt* OR discontinu* OR re-introduc* OR (adjust* NEAR/1 down*) OR defluoridation) in title, abstract, keywords or Keywords Plus

AND

("oral health" OR caries OR dental OR tooth OR teeth OR dentition OR enamel OR fluorosis OR flurosis) in title

Number of articles retrieved: 72
